# Supplementary material
Source: publisher site journal article supplement (https://www.dovepress.com/article/453879)
Supplement: Supplementary file 1 [file get_supplementary_file.php]

**Supplementary Table 1: Disaster Management Simulation Training Timetable**

| **No.** | **Activity title** | **Activity site** | **Activity time** |
| --- | --- | --- | --- |
| **1** | Lecture on the introduction to mass casualty incidents | Simulation center auditorium | 8:30-9:00 |
| **2** | Pre-simulation survey | Simulation center auditorium | 9:00-9:10 |
| **3** | Disaster simulation training | Simulation center lab 1 | 9:10-9:30 |
| **4** | Debriefing session | Simulation center lab 2 | 9:30-9:50 |
| **5** | Post-simulation survey | Simulation center lab 2 | 9:50-10:00 |
